# Supplementary material for: Understanding the effects of shape, material and location of incorporation of metal nanoparticles on the performance of plasmonic organic solar cells
Source: Royal Society of Chemistry journal article supplement (doi:10.1039/d0ra04076b), 2020-01-01
Supplement: d0ra04076b1.pdf [file d0ra04076b1.pdf]

## Supplementary Information

### **Understanding the Effects of Shape, Material and Location of Incorporation of Metal Nanoparticles on the Performance of Plasmonic Organic Solar Cells**

Minu Mohan, Ramkumar Sekar, and Manoj A G Namboothiry

*School of Physics, Indian Institute of Science Education and Research Thiruvananthapuram (IISER-TVM),*

*Maruthamala P O, Vithura, Thiruvananthapuram, Kerala, 695551, India*

(a)

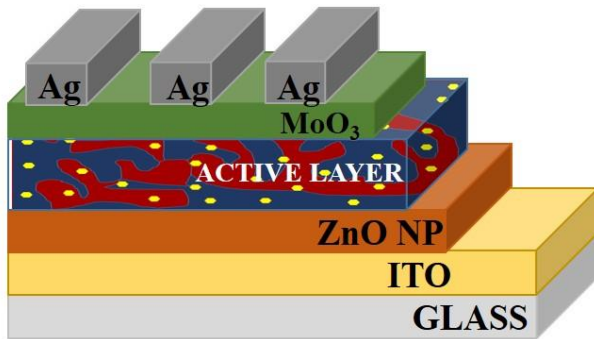

(b)

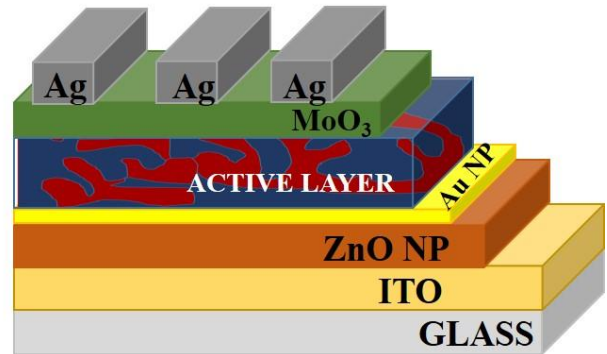

**Figure S1** Schematic of inverted plasmonic solar cell (a) ITO/ZnO/Active layer + metal NPs/MoO<sub>3</sub>/Ag (b) ITO/ZnO/ metal NPs / Active layer /MoO<sub>3</sub>/Ag.

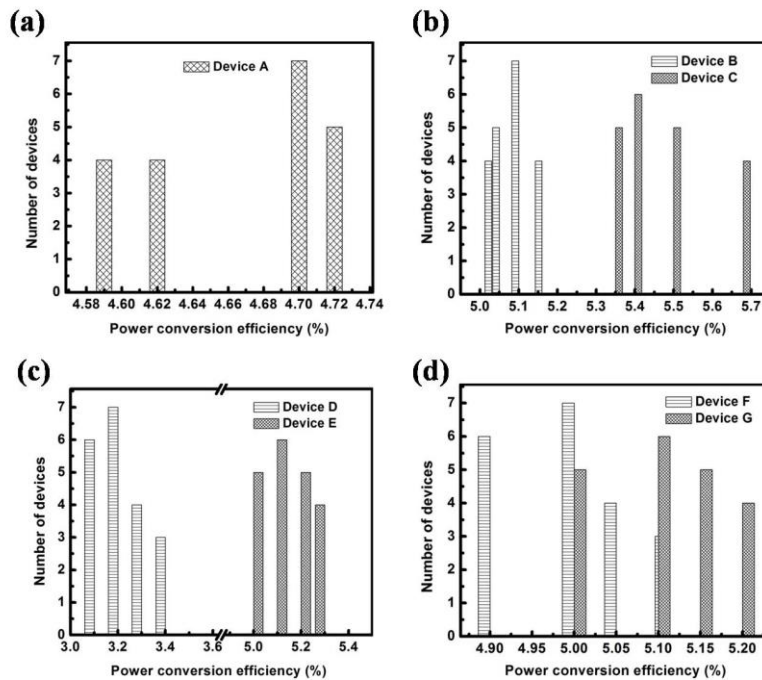

**Figure S2** Histogram of power conversion efficiency for 20 devices each structure (a) device A (b) device B and C (c) device D and E and (d) device F and G.

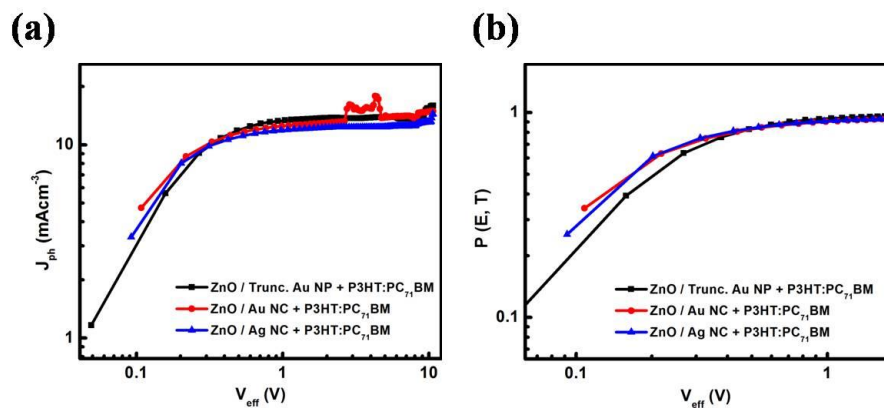

**Figure S3** (a) Photocurrent ( $J_{ph}$ ) versus effective voltage ( $V_{eff}$ ) and (b) exciton dissociation probability [ $P(E, T)$ ] vs.  $V_{eff}$  for NP + P3HT:PC<sub>71</sub>BM based plasmonic devices.

**Table S1**  $G_{max}$  and  $P(E, T)$  values of NP + P3HT:PC<sub>71</sub>BM based BHJ POSCs.

| Device notation | Device structure                                     | $G_{max}$<br>( $m^{-3} s^{-1}$ ) | $P(E, T)$<br>(%) |
|-----------------|------------------------------------------------------|----------------------------------|------------------|
| B               | ZnO / Trunc. octa. Au NP + P3HT :PC <sub>71</sub> BM | $8.09 \times 10^{27}$            | 92.99            |
| D               | ZnO / Au NC + P3HT:PC <sub>71</sub> BM               | $7.20 \times 10^{27}$            | 87.11            |
| F               | ZnO / Ag NC + P3HT:PC <sub>71</sub> BM               | $7.79 \times 10^{27}$            | 91.83            |
